# Supplementary material for: A peony-flower-like hierarchical mesocrystal formed by diphenylalanine
Source: Royal Society of Chemistry journal article supplement (doi:10.1039/c0jm00110d), 2010-01-01
Supplement: c0jm00110d.pdf [file c0jm00110d.pdf]

## Supporting Information

### A Peony-Flower-like Hierarchical Mesocrystal formed by Diphenylalanine\*\*

Ying Su,<sup>a</sup> Xuehai Yan,<sup>a,b</sup> Anhe Wang,<sup>a</sup> Jinbo Fei,<sup>a</sup> Yue Cui,<sup>a</sup> Qiang He,<sup>a,b</sup> and Junbai Li<sup>a,\*</sup>

1. Beijing National Laboratory for Molecular Sciences (BNLMS), Key Lab of Colloid and Interface Science, Institute of Chemistry, Chinese Academy of Sciences, Beijing 100190, China

2. National Center for Nanoscience and Technology, No. 11, Bei Yi Tiao, Zhong guan cun, Beijing, 100190, China

\*To whom correspondence should be addressed. E-mail: jbli@iccas.ac.cn

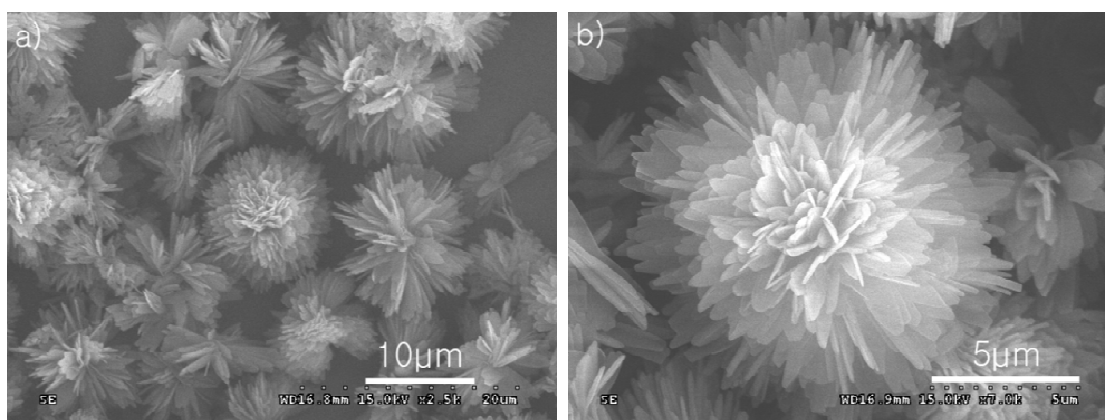

**Figure S1** (a) low and (b) high magnification SEM images of flower-like FF aggregates in 1, 4-dioxane.

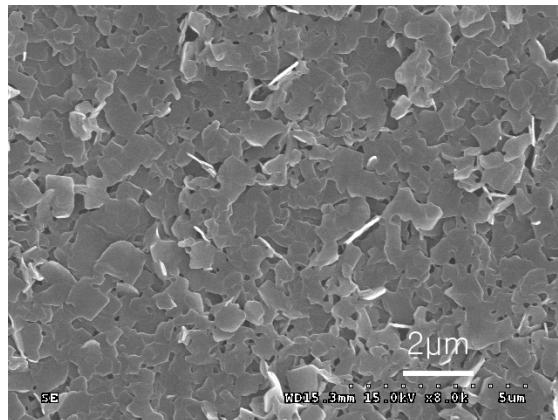

**Figure S2** SEM images of FF flakes in ethyl acetate.

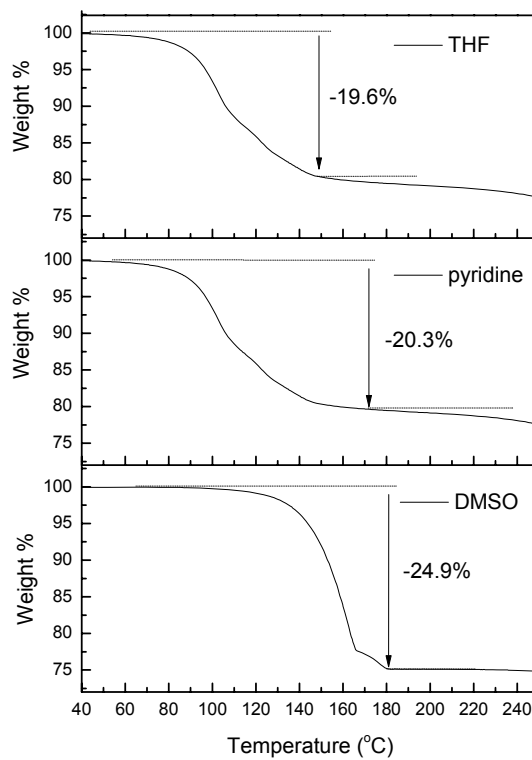

**Figure S3** TGA curves between 40–250 °C of mesocrystals obtained in different solvents.

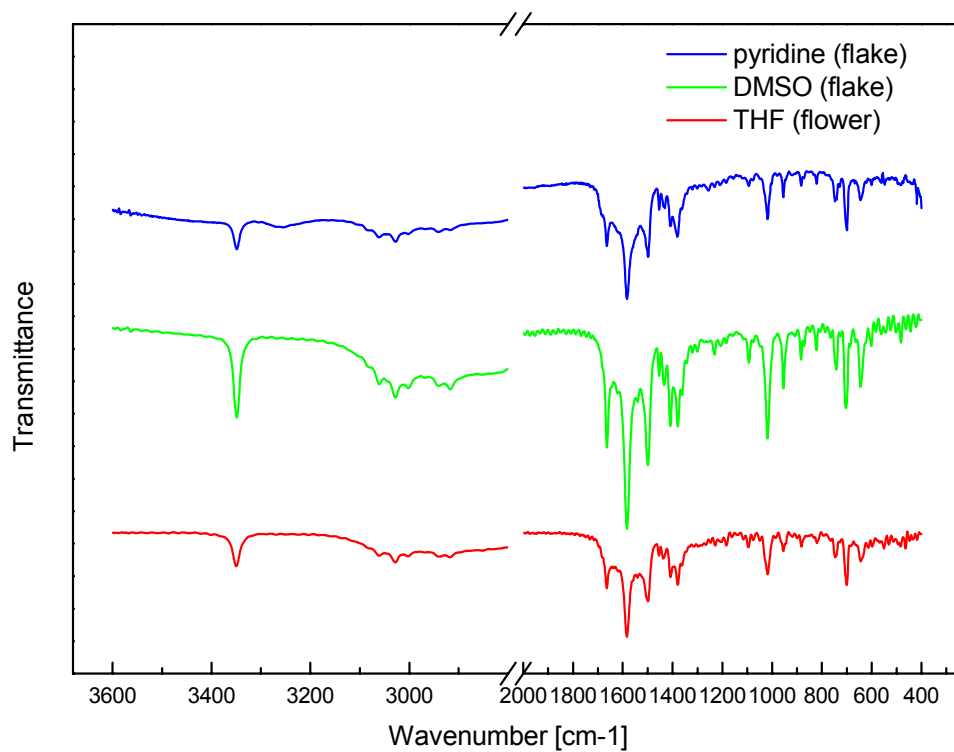

**Figure S4** FTIR spectra of FF nanostructures self-assembled in THF (red), DMSO (green), and pyridine (blue).

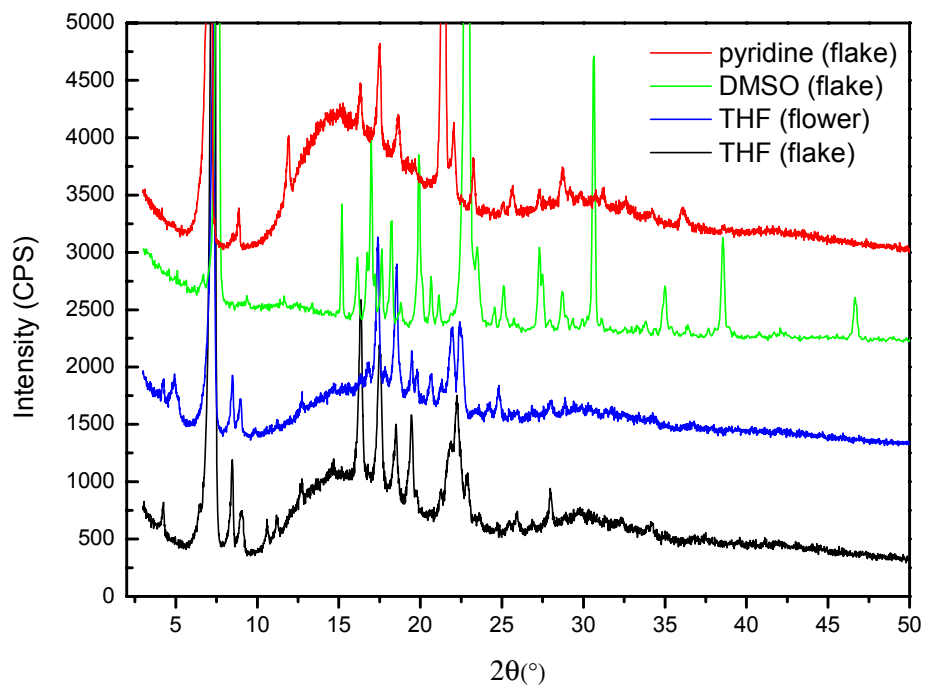

**Figure S5** X-ray diffraction of different samples prepared in THF (adding HFIP) (black), DMSO (adding HFIP) (blue), and pyridine (adding HFIP) (green) and THF (without adding HFIP) (red).
